# Supplementary material
Source: Springer Nature journal article supplement (https://www.springermedizin.de/resource/supplementary/12913_2011_2084_MOESM2_ESM.pdf/9529776)

# Effect on mean BMI

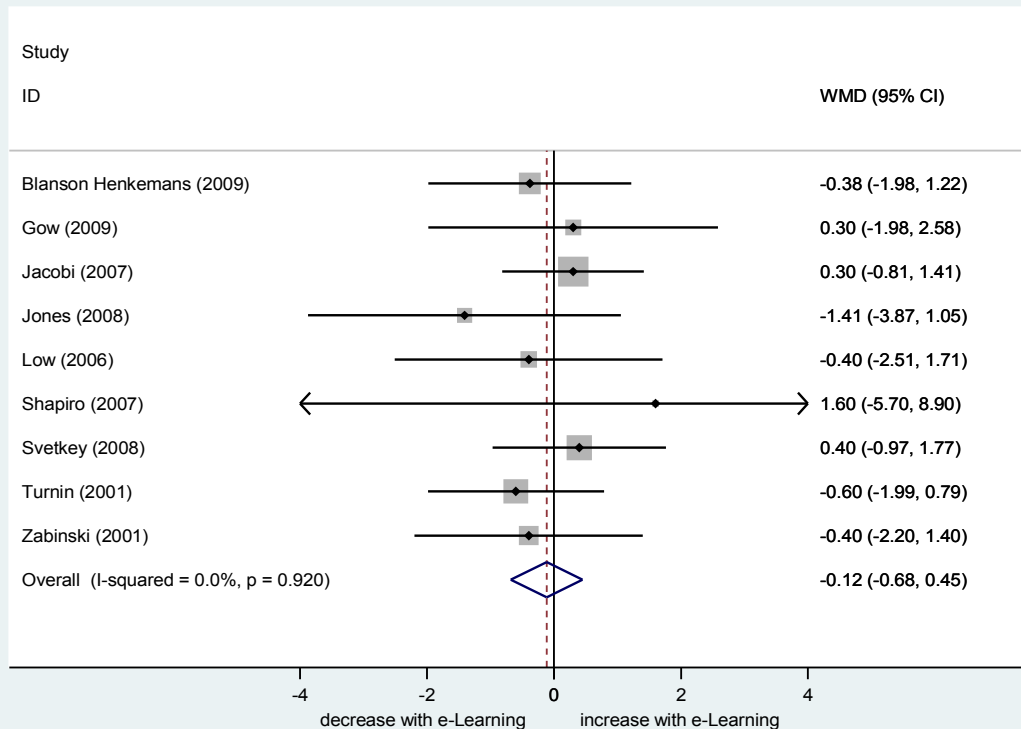

Supplement: MOESM2 [file 9529776]
